# Supplementary material
Source: publisher figshare collection journal article supplement (https://geolsoc.figshare.com/ndownloader/files/5426750)
Supplement: Supplementary file 1 [file 5426750]

Geowissenschaftliches Zentrum der Universität Göttingen, Goldschmidtstr. 3, 37077 GÖTTINGEN
	K/Ar - Age Determinations P. Oyhantcabal - Uruguay
Ar - Isotopic Abundance		Spike-Isotopic Comp.		Decay Constants [1/a]:		Potassium
40 Ar :	99.6000%	40 Ar :	0.0099980%	l e :	5.810E-11	40K :	0.011670%
38 Ar :	0.0630%	38 Ar :	99.9890000%	l b :	4.962E-10	K2O/K :	0.8302
36 Ar :	0.3370%	36 Ar :	0.0009998%			Atomic Weight [g/mol]:
Standard Temperature Pressure (STP)				l tot:	5.543E-10	tot Ar :	39.9477
	0° C; 760 mm Hg			Molar Volume		40Ar :	39.9624
Normal Atmosphere (DIN 1343)				[ml] :	22413.8	tot K :	39.1027
	273,15K; 1013,25 mbar
Sample	Latitude S	Longitude W	Rock	Fraction	Spike	K2O	40 Ar *	40 Ar *	Age	2s-Error	2s-Error
					[ No. ]	[ Wt. % ]	[ nl/g ] STP	[ % ]	[ Ma ]	[ Ma ]	[%]
UY-4-04	34° 33.062'	055° 17.018'	Metapelite	Sericite <2µm	3448	3.59	73.61	94.73	544.7	5.9	1.1
SB-632	34° 35.4'	055° 26.5'	Granitoid	Hornblende	3410	1.58	32.99	98.83	553.2	17.0	3.1
SB-527	34° 34.421'	055° 14.113'	Pegmatite	Muscovite	3420	10.60	222.66	97.67	556.1	9.8	1.8
UY-5-04	34° 33.062'	055° 17.018'	Metapelite	Sericite <2µm	3450	2.27	47.69	76.14	556.1	7.9	1.4
SB-553	34° 40.265'	054° 55.984'	Pegmatite	Muscovite	3419	10.67	239.28	98.61	588.2	6.0	1.0
SB-042	34° 55.017'	054° 51.179'	Pegmatite	Muscovite	3421	10.32	246.87	97.24	621.3	11.6	1.9
UY-10-04	34° 55.07'	054° 51.423	Pegmatite	Muscovite	3394	10.30	249.30	98.37	627.5	10.1	1.6
Datum: WGS 84
